# Supplementary material for: Pain‐Related Gene Solute Carrier Family 24 Member 3 Is a Prognostic Biomarker and Correlated with Immune Infiltrates in Cervical Squamous Cell Carcinoma and Endocervical Adenocarcinoma: A Study via Integrated Bioinformatics Analyses and Experimental Verification
Source: Hindawi journal article supplement (doi:10.1155/2023/4164232), 2023-01-01
Supplement: f1 [file 4164232.f1.zip]

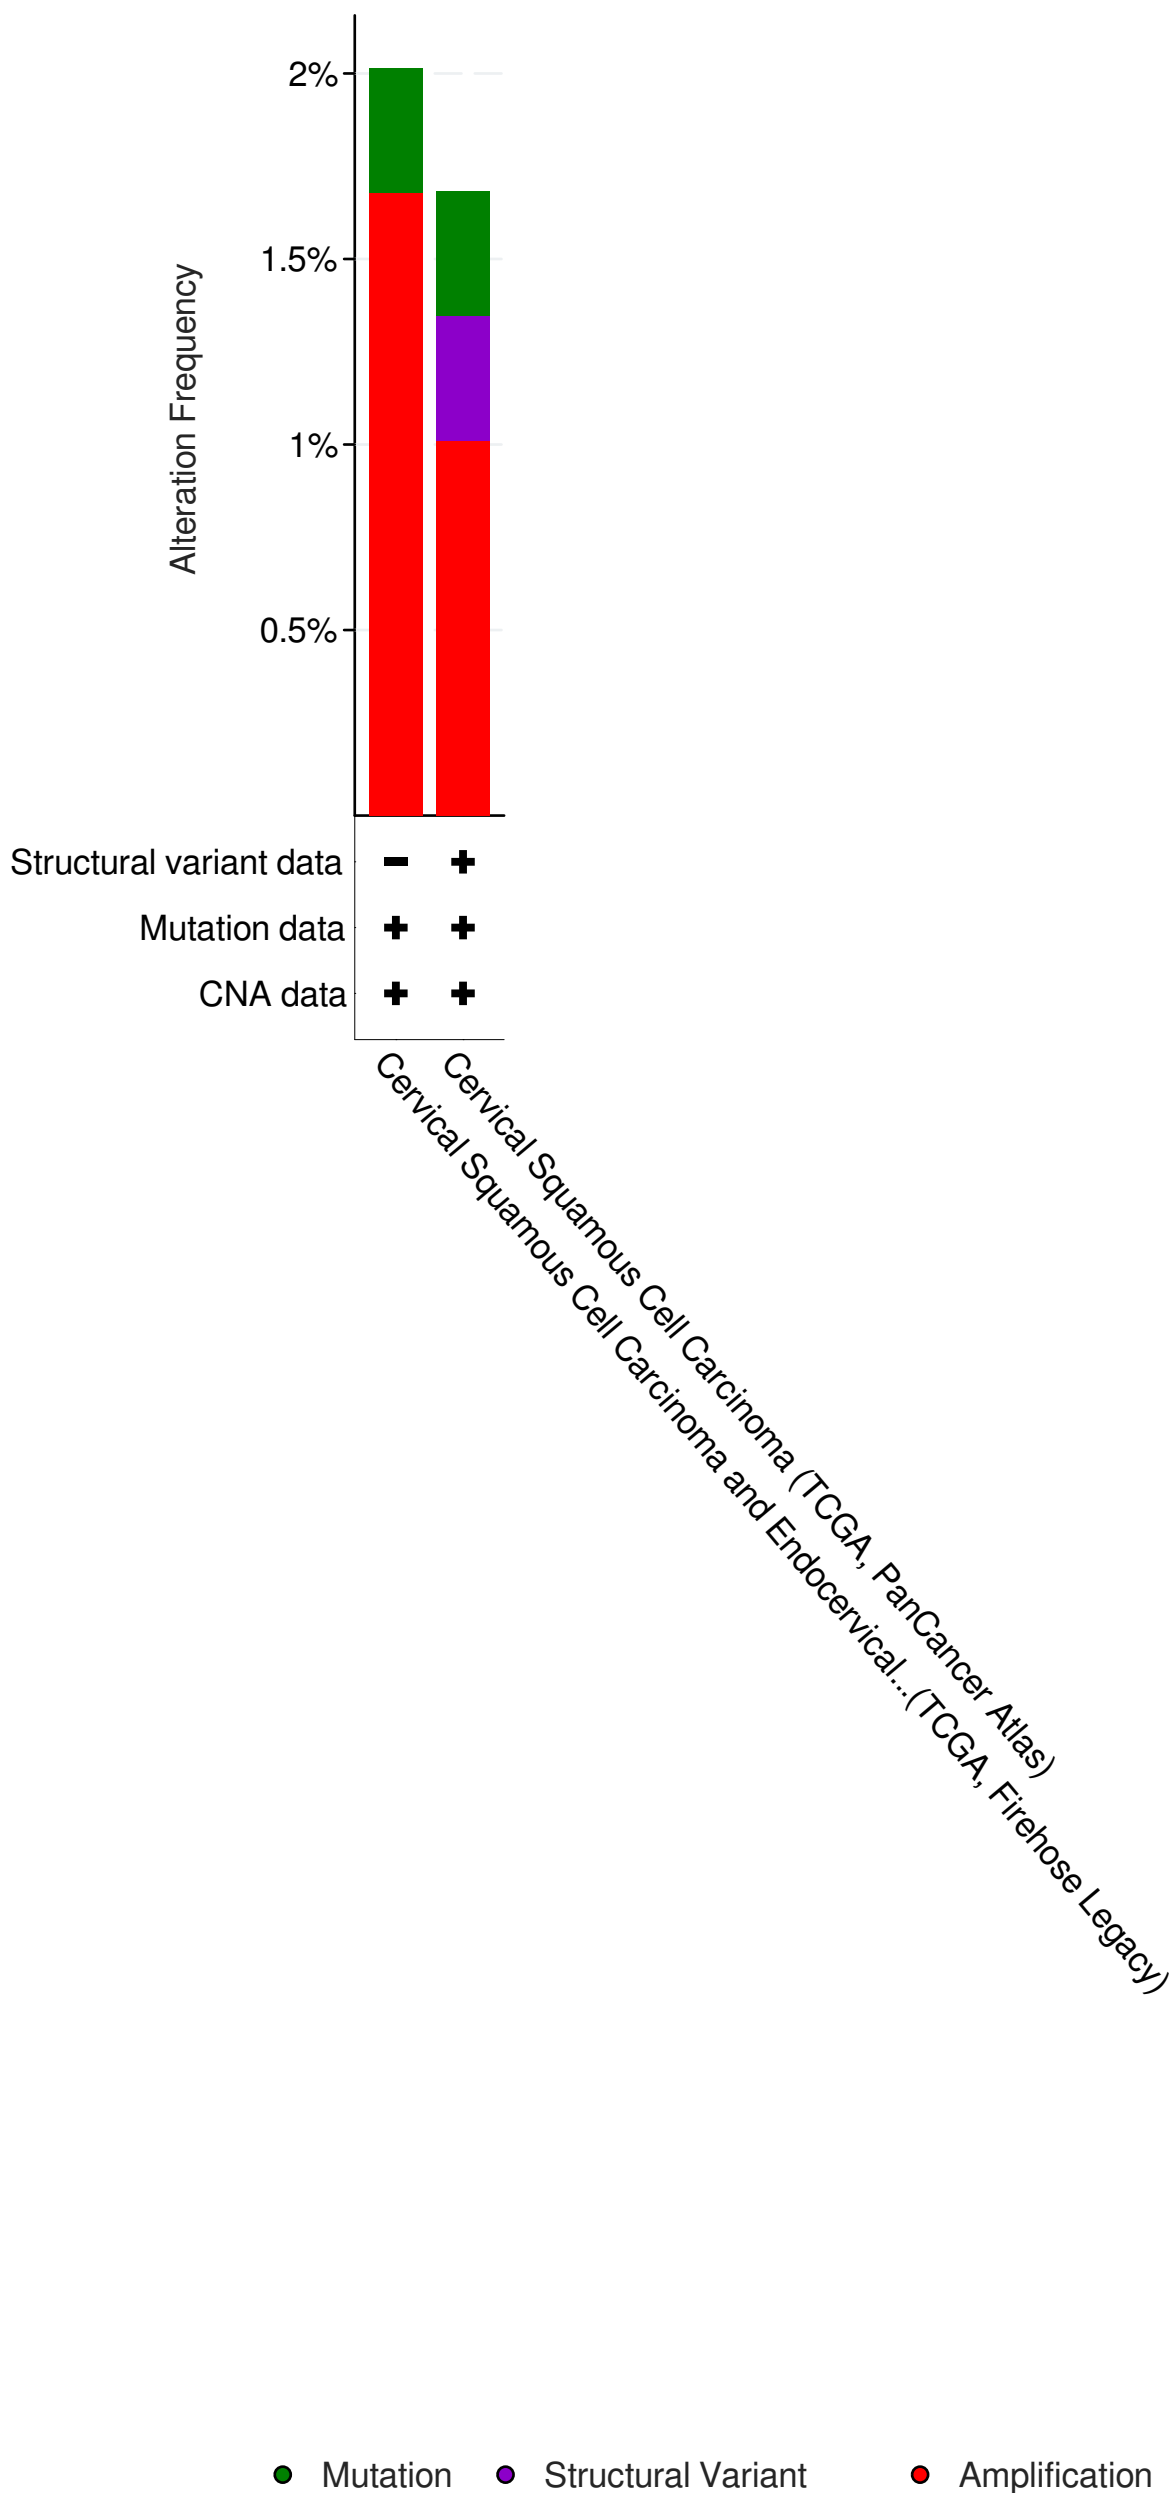

SLC24A3 SNV    + Mutation    + Non-Mutation

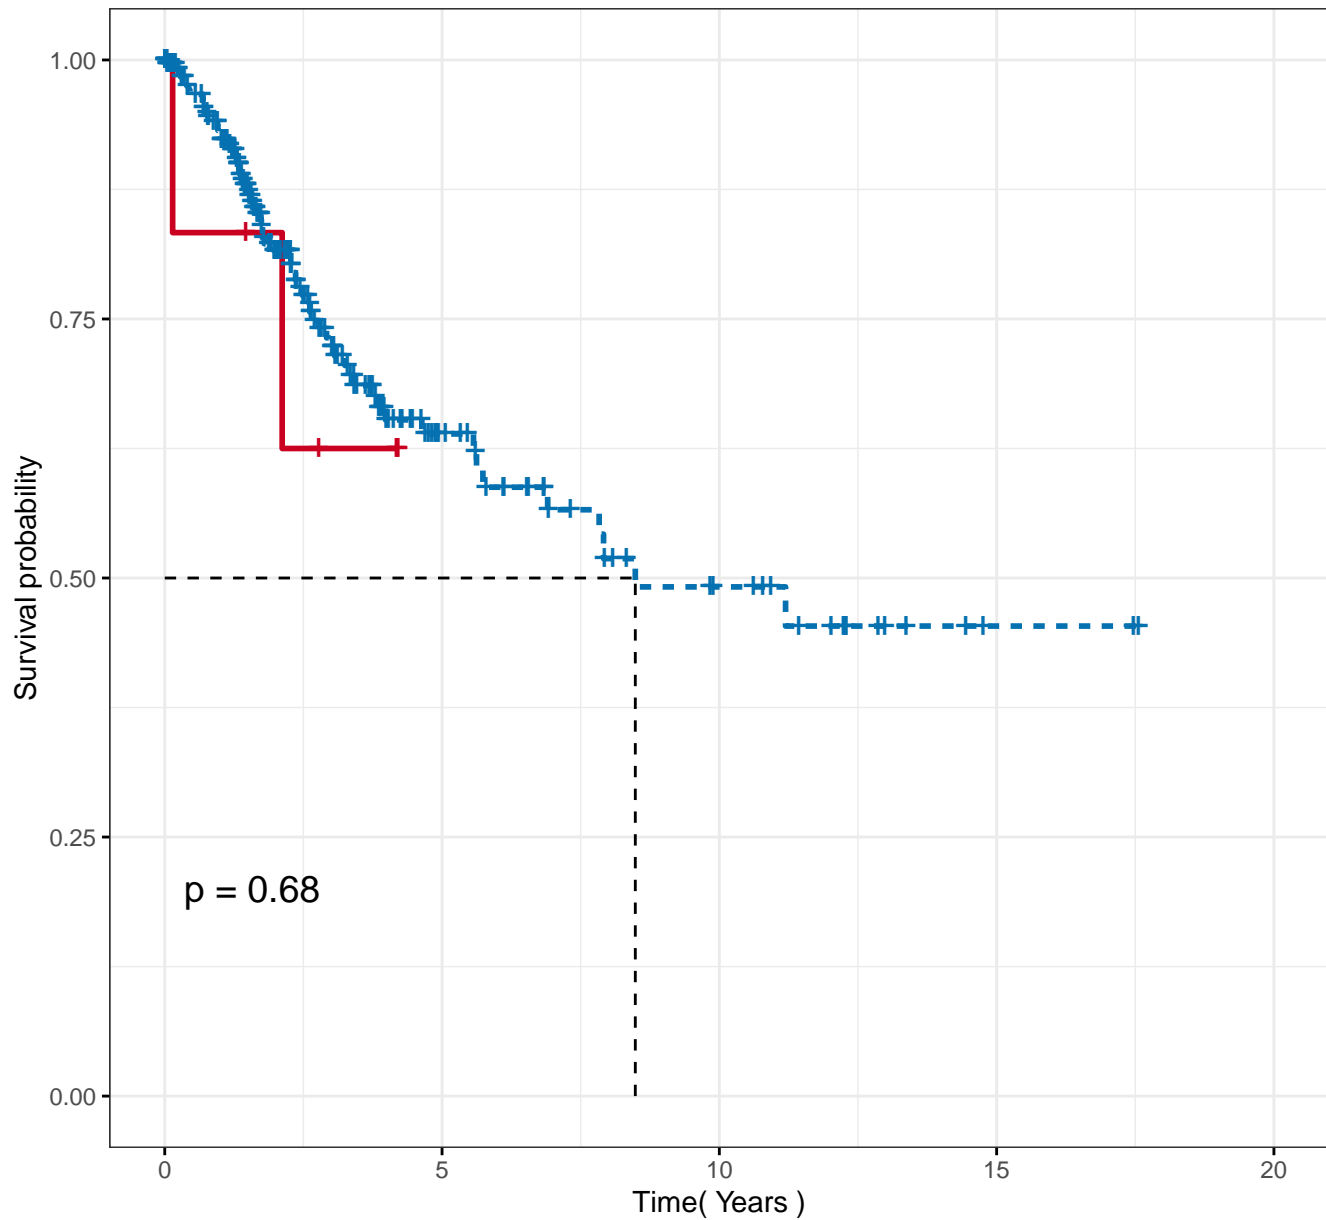

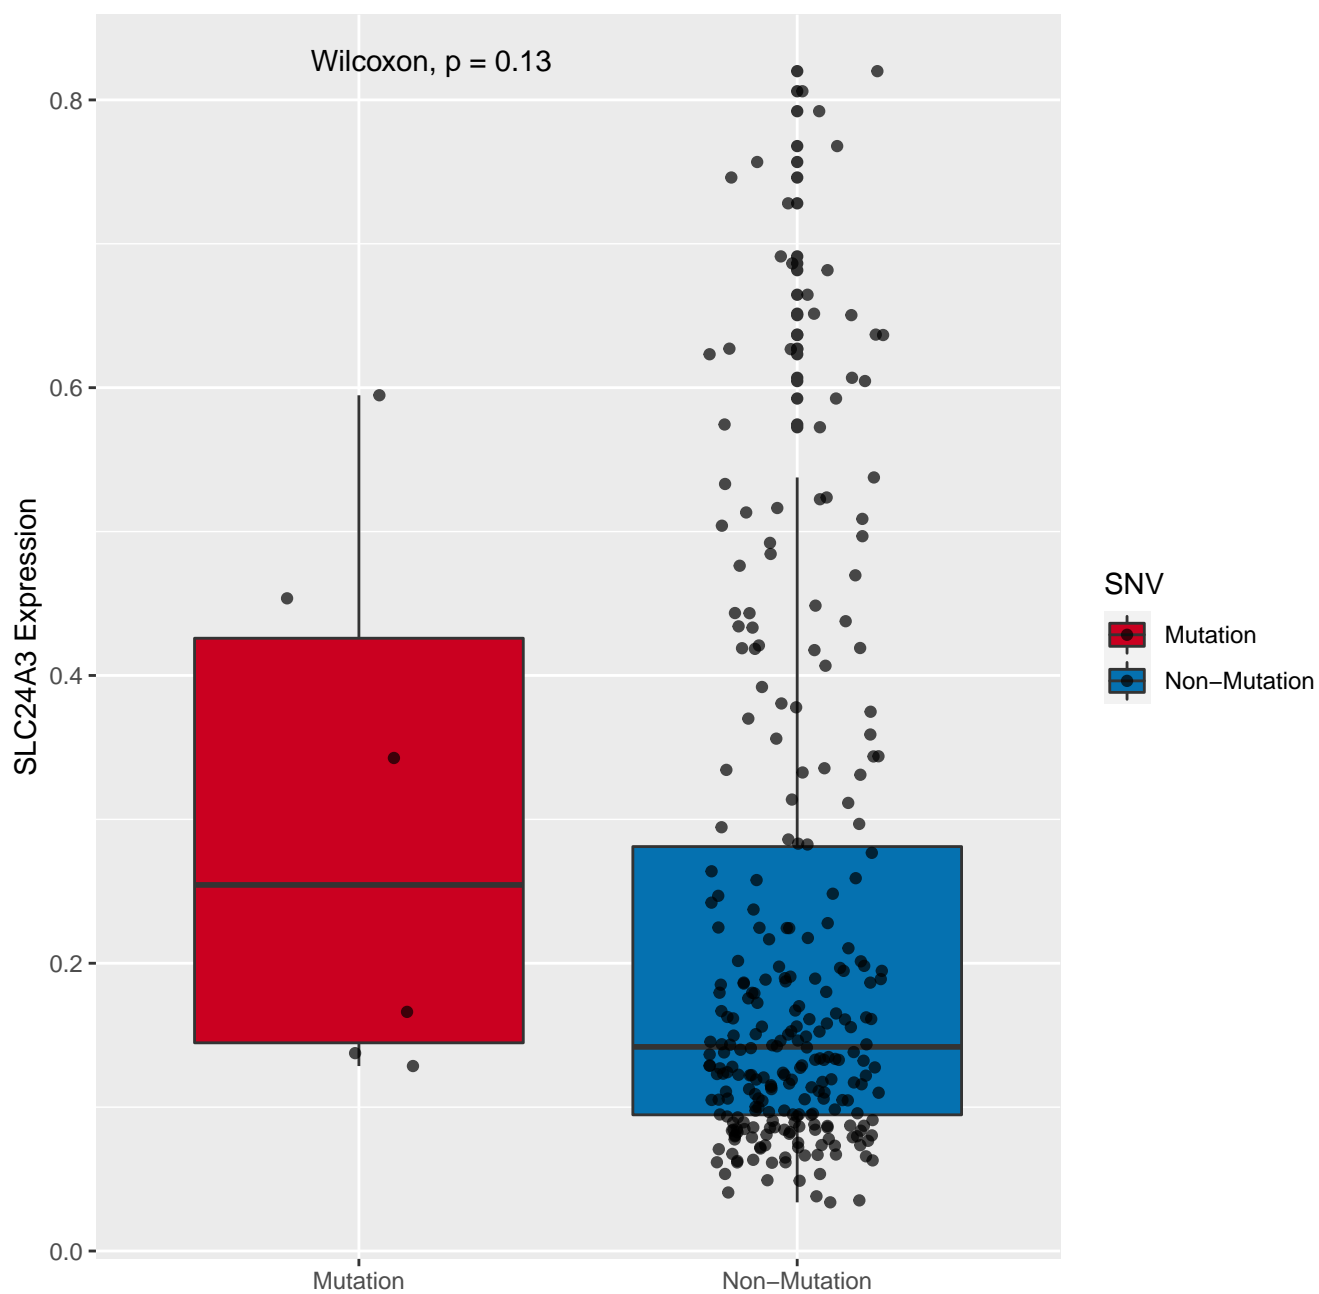

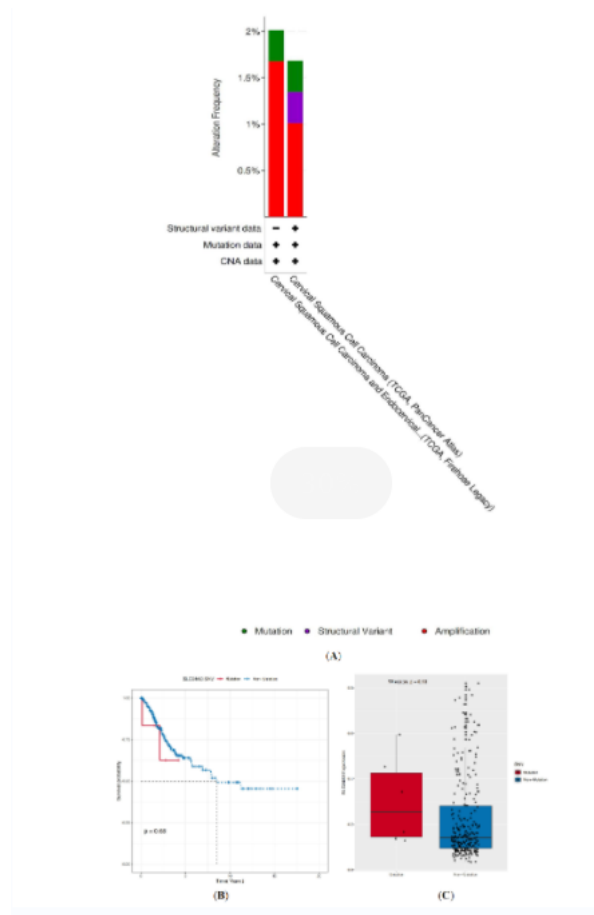

Supplementary 2. Figure S2. Analysis of SNV mutations of SLC24A3. (A) The alteration frequency of SLC24A3. (B) Kaplan-Meier curve showed overall survival probability of patients with (red) or without (blue) SNV mutations of SLC24A3 in TCGA-CESC cohort. (C) Box plot showed the relation between SLC24A3 expression and SNV mutations in TCGA-CESC cohorts.
