# Supplementary material for: Pain‐Related Gene Solute Carrier Family 24 Member 3 Is a Prognostic Biomarker and Correlated with Immune Infiltrates in Cervical Squamous Cell Carcinoma and Endocervical Adenocarcinoma: A Study via Integrated Bioinformatics Analyses and Experimental Verification
Source: Hindawi journal article supplement (doi:10.1155/2023/4164232), 2023-01-01
Supplement: f1 [file 4164232.f1.zip]

# TCGA-CESC

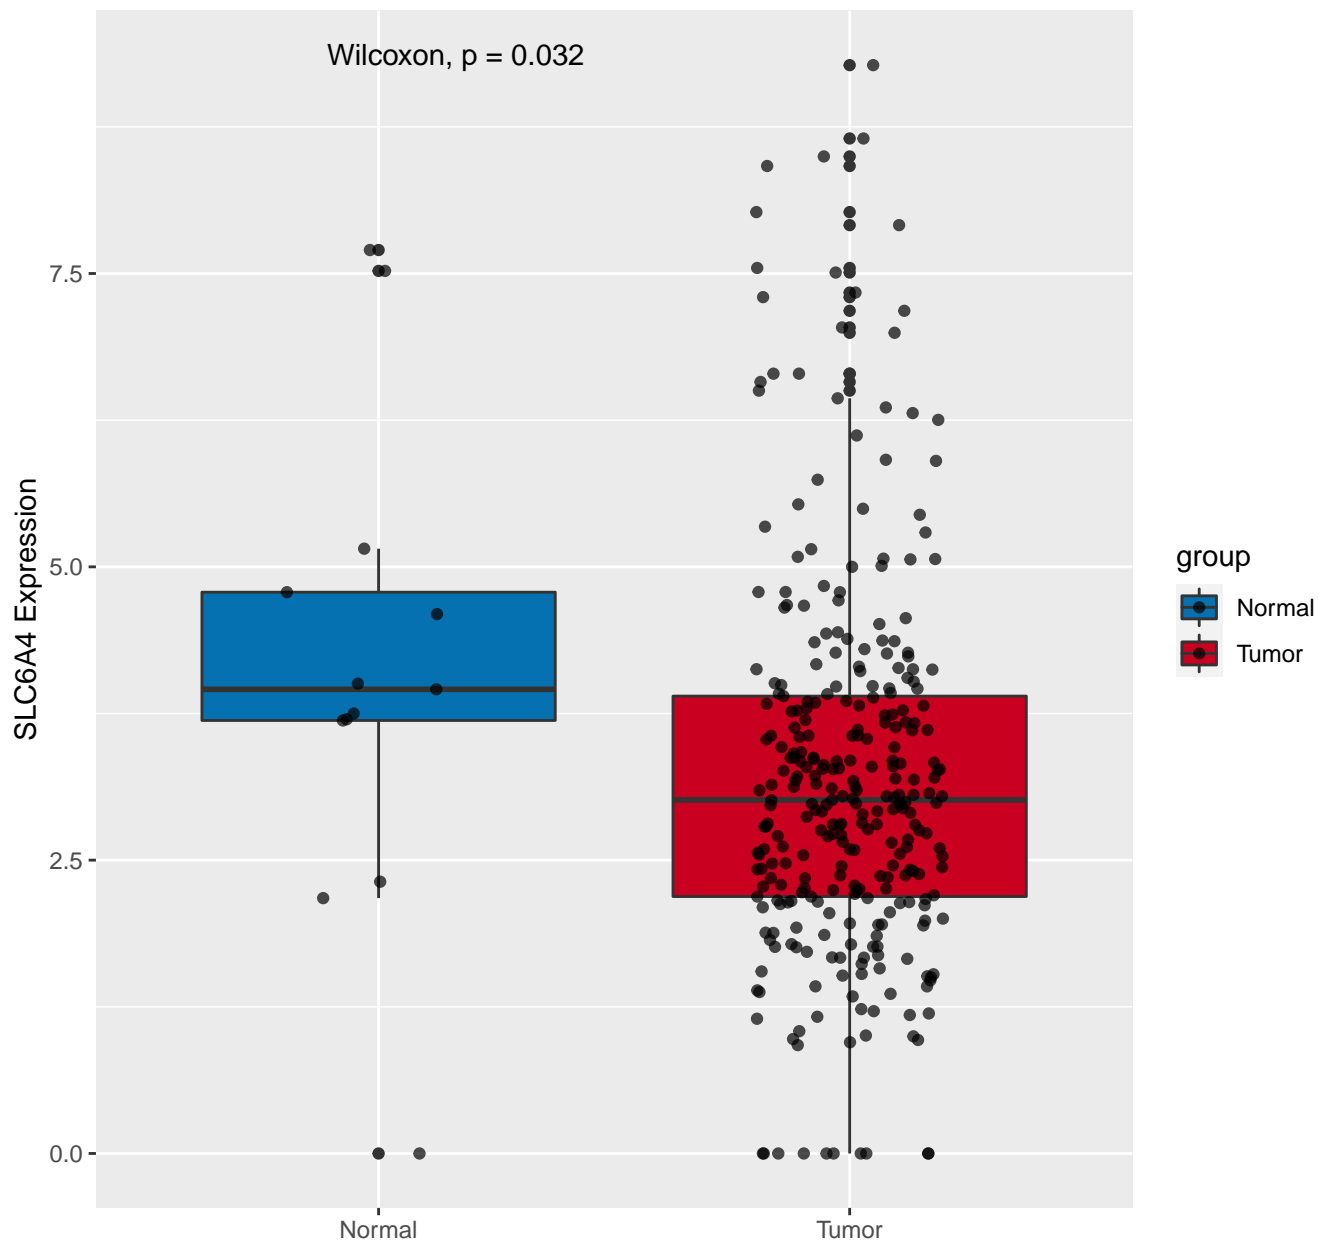

# GSE63514

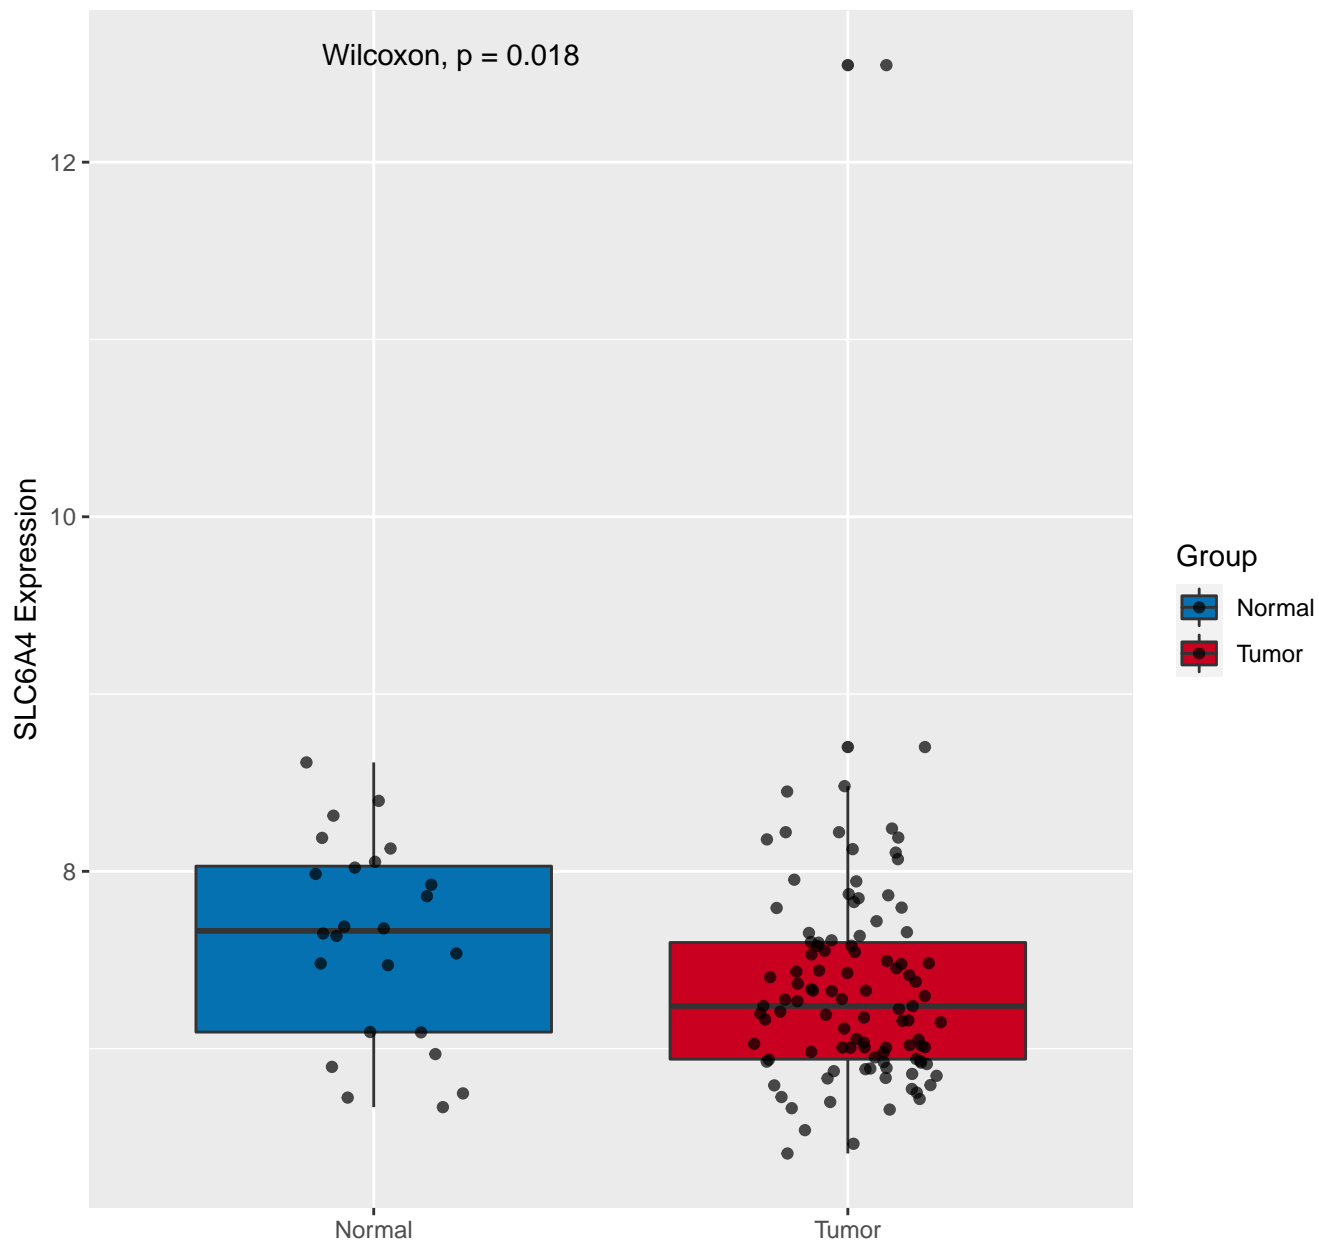

TCGA CESC SLC6A4 Expression    + High    + Low

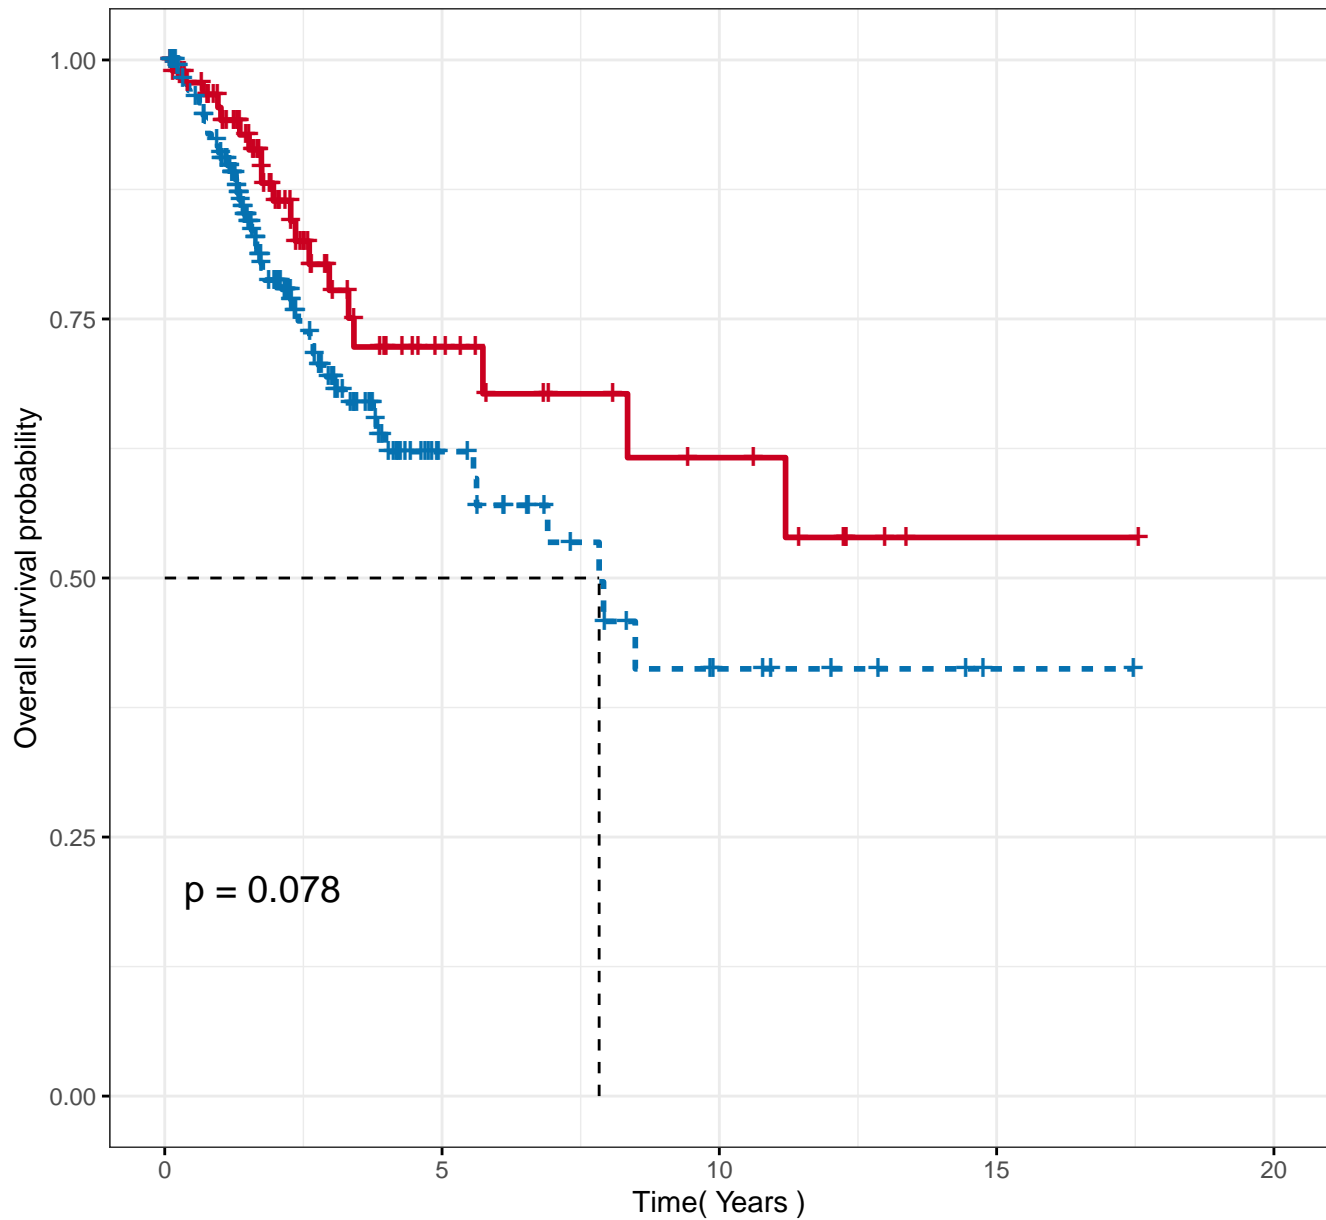

TCGA CESC SLC6A4 Expression    + High    + Low

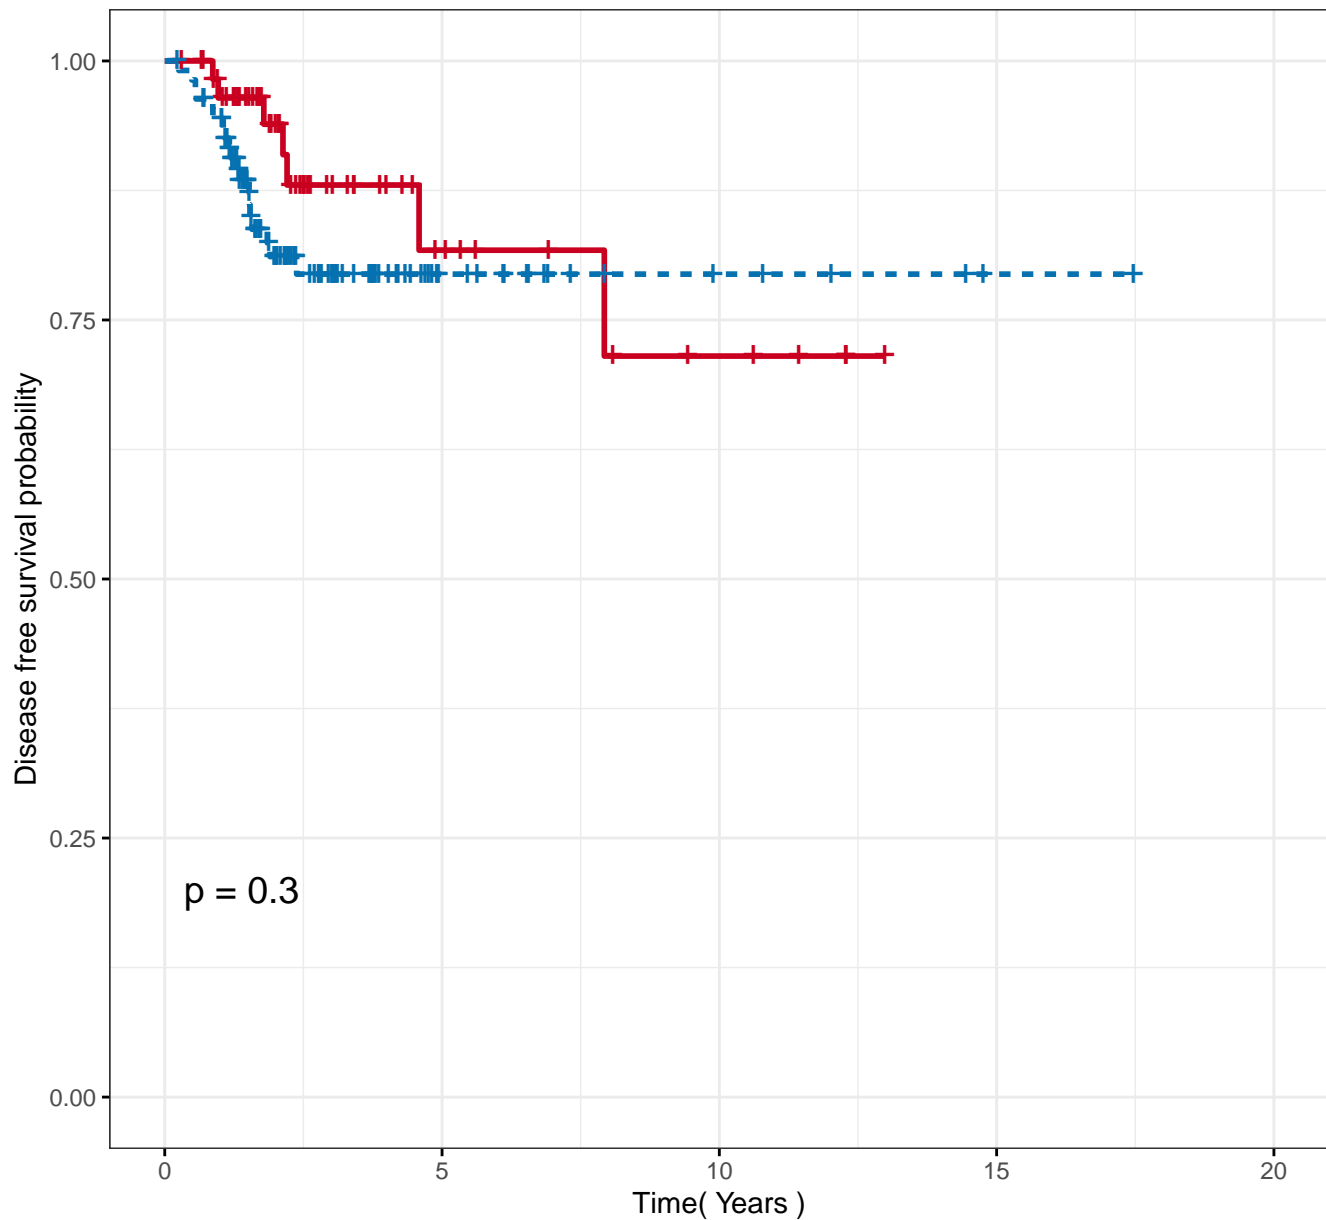

TCGA CESC SLC6A4 Expression + High + Low

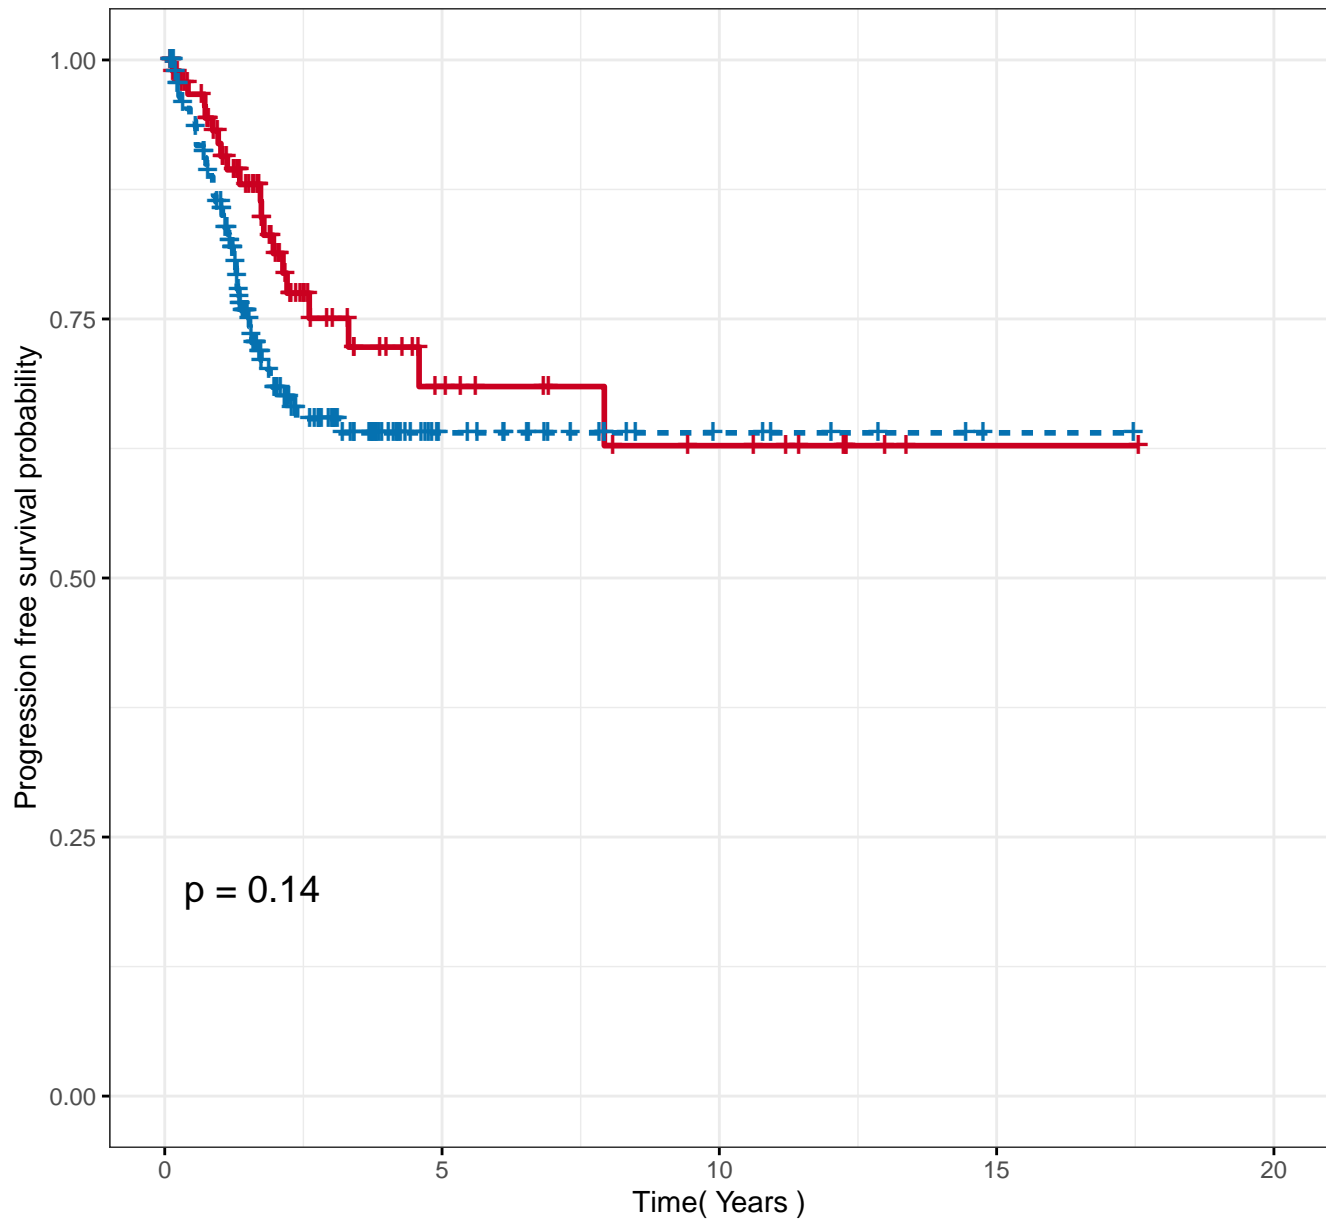

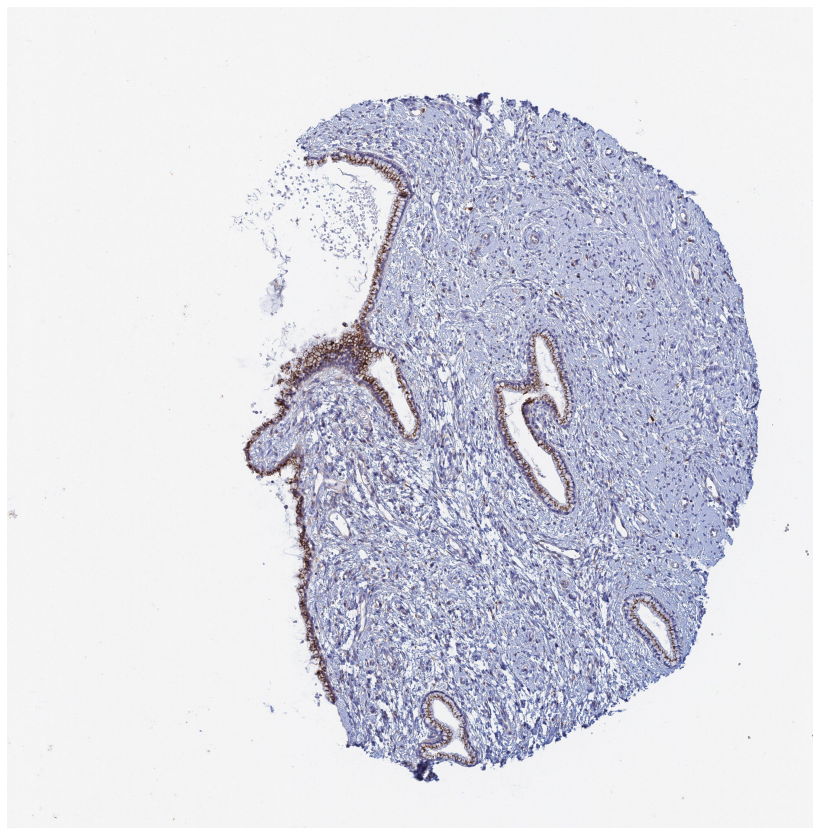

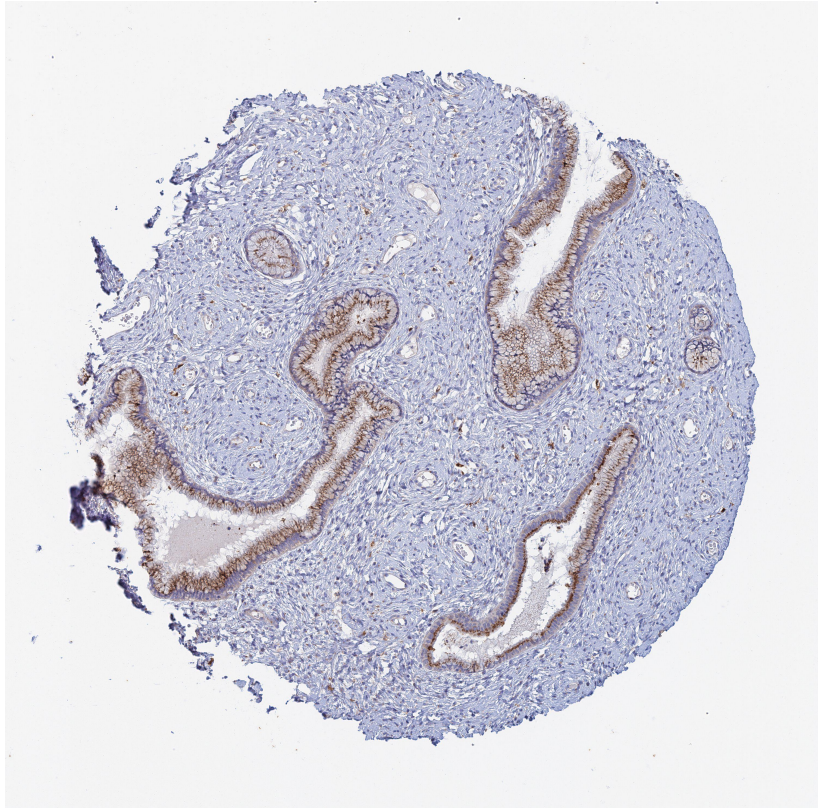

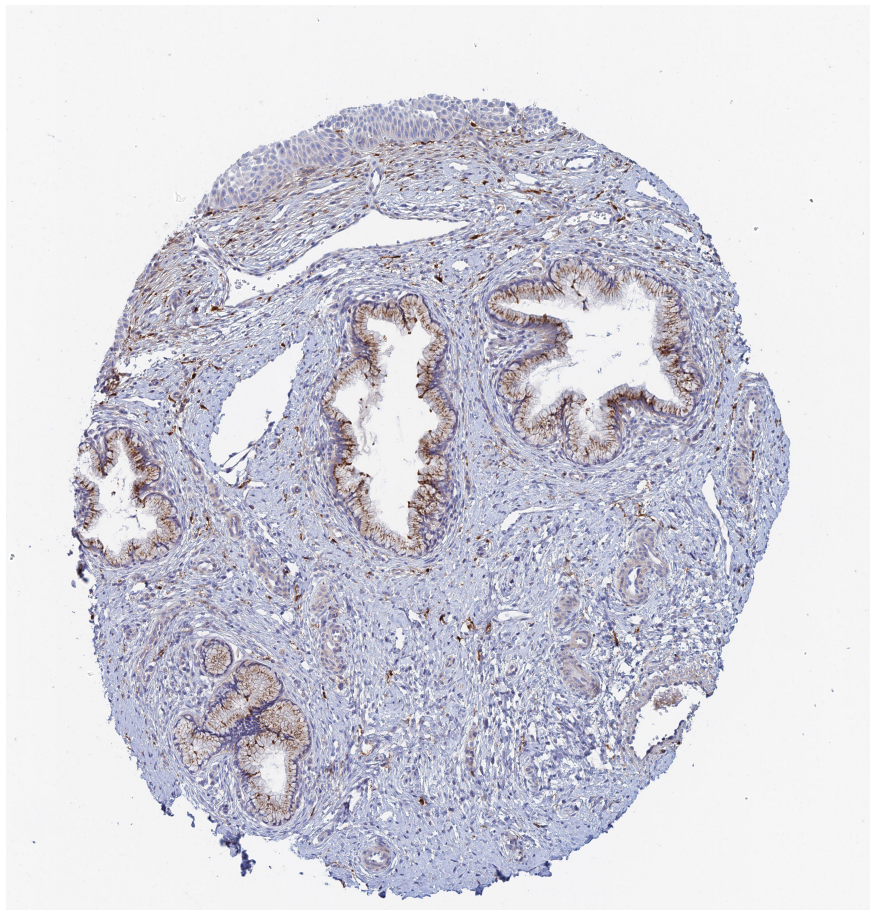



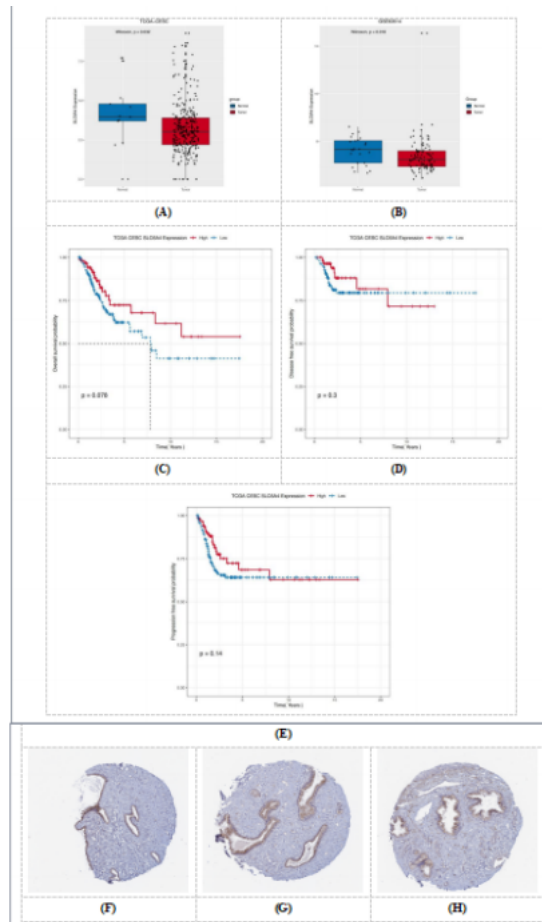

Supplementary 1. Figure S1. Correlation analysis of SLC6A4 in GSE63514 and TCGA-CESC cohorts. (A), (B) Expression levels of SLC6A4 between tumor and normal cases both in TCGA-CESC and GSE63514 cohorts. (C), (D), (E) Overall survival, disease free survival and progression survival comparison between high and low SLC6A4 groups in TCGA-CESC database. (F), (G), (H) The SLC24A3 expression in pathological cervical tissues and healthy cervical tissues from the Human Protein Atlas database.
