# Supplementary material for: Pain-Related Gene Solute Carrier Family 24 Member 3 Is a Prognostic Biomarker and Correlated with Immune Infiltrates in Cervical Squamous Cell Carcinoma and Endocervical Adenocarcinoma: A Study via Integrated Bioinformatics Analyses and Experimental Verification
Source: Comput Math Methods Med. 2023 Feb 7;2023:4164232. doi: 10.1155/2023/4164232 (PMC9928512; doi:10.1155/2023/4164232)
Supplement: Supplementary Materials — Figure S1: correlation analysis of SLC6A4 in GSE63514 and TCGA-CESC cohorts. (A, B) Expression levels of SLC6A4 between tumor and normal cases both in TCGA-CESC and GSE63514 cohorts. (C–E) Overall survival, disease-free survival, and progression survival comparisons between high and low SLC6A4 groups in TCGA-CESC database. (F–H) The SLC24A3 expression in pathological cervical tissues and healthy cervical tissues from the Human Protein Atlas database. Figure S2: analysis of SNV mutations of SLC24A3. (A) The alteration frequency of SLC24A3. (B) The Kaplan-Meier curve showed overall survival probability of patients with (red) or without (blue) SNV mutations of SLC24A3 in TCGA-CESC cohort. (C) Box plot showed the relation between SLC24A3 expression and SNV mutations in TCGA-CESC cohorts. Supplementary Table 1: 117 pain-related genes from MSigDB. Supplementary Table 2: clinical characteristics of TCGA CESC data between the CNV and SNV groups. Supplementary Table 3: primer sequence of SLC24A3 used in qRT-PCR. [file 4164232.f1.zip]

Archive with 5 entries (5 files):
- Figure S1(A-H).pdf
- Figure S2(A-C).pdf
- Table S1.txt
- Table S2.txt
- Table S3.txt
