# Supplementary material for: Pain-Related Gene Solute Carrier Family 24 Member 3 Is a Prognostic Biomarker and Correlated with Immune Infiltrates in Cervical Squamous Cell Carcinoma and Endocervical Adenocarcinoma: A Study via Integrated Bioinformatics Analyses and Experimental Verification
Source: Comput Math Methods Med. 2023 Feb 7;2023:4164232. doi: 10.1155/2023/4164232 (PMC9928512; doi:10.1155/2023/4164232)
Supplement: Supplementary Materials — Figure S1: correlation analysis of SLC6A4 in GSE63514 and TCGA-CESC cohorts. (A, B) Expression levels of SLC6A4 between tumor and normal cases both in TCGA-CESC and GSE63514 cohorts. (C–E) Overall survival, disease-free survival, and progression survival comparisons between high and low SLC6A4 groups in TCGA-CESC database. (F–H) The SLC24A3 expression in pathological cervical tissues and healthy cervical tissues from the Human Protein Atlas database. Figure S2: analysis of SNV mutations of SLC24A3. (A) The alteration frequency of SLC24A3. (B) The Kaplan-Meier curve showed overall survival probability of patients with (red) or without (blue) SNV mutations of SLC24A3 in TCGA-CESC cohort. (C) Box plot showed the relation between SLC24A3 expression and SNV mutations in TCGA-CESC cohorts. Supplementary Table 1: 117 pain-related genes from MSigDB. Supplementary Table 2: clinical characteristics of TCGA CESC data between the CNV and SNV groups. Supplementary Table 3: primer sequence of SLC24A3 used in qRT-PCR. [file 4164232.f1.zip › Table S1.txt]

	pain_gene
1	CDK5
2	NMU
3	SMR3B
4	MMP24
5	SCN11A
6	MGLL
7	CHRNA4
8	CHRNB2
9	ADCYAP1
10	MRGPRX2
11	CNR1
12	CNR2
13	ADORA1
14	ATPSCKMT
15	TAFA4
16	ADRA2C
17	EDN1
18	EDNRB
19	EPHB1
20	NR2F6
21	F2R
22	FABP5
23	PHF24
24	BACE1
25	MTOR
26	FYN
27	GIP
28	SMR3A
29	GRIN2A
30	GRIN2D
31	GRM1
32	HOXB8
33	HOXD1
34	HTR2A
35	IAPP
36	IL10
37	IL12B
38	ITGA2
39	KCNA1
40	KCNA2
41	KCND2
42	ARRB2
43	MECP2
44	MME
45	NDN
46	CCN3
47	NPY1R
48	NPY2R
49	NTRK1
50	NTSR1
51	OPRD1
52	OPRK1
53	OPRL1
54	OPRM1
55	OXT
56	P2RX3
57	P2RX4
58	P2RX7
59	P2RY1
60	KCNK4
61	PENK
62	RETREG1
63	ACP3
64	ANO1
65	TMEM100
66	SCN3B
67	MAPK1
68	MAPK3
69	NMUR2
70	LXN
71	PTAFR
72	NLGN2
73	OPRPN
74	PRDM12
75	ALOXE3
76	PROK2
77	BDKRB1
78	SCN1A
79	SCN9A
80	SCN10A
81	CCL2
82	CCL3
83	CXCL12
84	SLC9A1
85	TAC1
86	CCR2
87	VIP
88	CACNB3
89	CXCR4
90	CALCA
91	SPX
92	TMEM120A
93	NIPSNAP1
94	ZFHX2
95	NPFF
96	CCK
97	TRPA1
98	ASIC3
99	PTGES
100	CRH
101	DBH
102	P2RX2
103	GCH1
104	GJA4
105	PRKCG
106	RELN
107	LPAR5
108	RET
109	PIRT
110	VWA1
111	SLC6A2
112	TACR1
113	THBS1
114	TSPO
115	THBS4
116	UCN
117	CAPN2
