# Supplementary material for: Pain-Related Gene Solute Carrier Family 24 Member 3 Is a Prognostic Biomarker and Correlated with Immune Infiltrates in Cervical Squamous Cell Carcinoma and Endocervical Adenocarcinoma: A Study via Integrated Bioinformatics Analyses and Experimental Verification
Source: Comput Math Methods Med. 2023 Feb 7;2023:4164232. doi: 10.1155/2023/4164232 (PMC9928512; doi:10.1155/2023/4164232)
Supplement: Supplementary Materials — Figure S1: correlation analysis of SLC6A4 in GSE63514 and TCGA-CESC cohorts. (A, B) Expression levels of SLC6A4 between tumor and normal cases both in TCGA-CESC and GSE63514 cohorts. (C–E) Overall survival, disease-free survival, and progression survival comparisons between high and low SLC6A4 groups in TCGA-CESC database. (F–H) The SLC24A3 expression in pathological cervical tissues and healthy cervical tissues from the Human Protein Atlas database. Figure S2: analysis of SNV mutations of SLC24A3. (A) The alteration frequency of SLC24A3. (B) The Kaplan-Meier curve showed overall survival probability of patients with (red) or without (blue) SNV mutations of SLC24A3 in TCGA-CESC cohort. (C) Box plot showed the relation between SLC24A3 expression and SNV mutations in TCGA-CESC cohorts. Supplementary Table 1: 117 pain-related genes from MSigDB. Supplementary Table 2: clinical characteristics of TCGA CESC data between the CNV and SNV groups. Supplementary Table 3: primer sequence of SLC24A3 used in qRT-PCR. [file 4164232.f1.zip › Table S2.txt]

	CNV			P value	SNV		P value
	Amplification	Deletion	Normal		MUT	WT
Age				0.1656			0.4791
>=60	2	3	48		0	50
<60	3	4	202		6	198
Stage				0.03614			0.4028
1+2	1	6	192		6	190
3+4	4	1	53		0	52
NA	0	0	5		0	6
Grade				0.8566			0.8426
1+2	3	3	129		3	127
3+4	1	3	97		2	97
NA	1	1	24		1	24
Pathologic_T				0.5133			0.276
1+2	2	6	177		6	173
3+4	1	0	24		0	24
NA	2	1	49		0	51
Pathologic_N				0.7933			0.5642
N0	1	4	108		3	103
N1	0	2	48		0	50
Pathologic_M				NA			1
M0	0	2	91		3	90
M1	0	0	11		0	10
